# Supplementary material
Source: publisher figshare collection journal article supplement (https://sage.figshare.com/ndownloader/files/18769571)
Supplement: Supplementary file 1 [file 18769571]

## Supplementary Checklist: Research Design Actions for Photovoice

| Research design actions                                                                                                                          | Yes | No |
|--------------------------------------------------------------------------------------------------------------------------------------------------|-----|----|
| <b>Before the research project begins:</b>                                                                                                       |     |    |
| Does the consent specify whether the participant will be given the choice of whether or not to keep their name associated with their photo-text? |     |    |
| Has a detailed description been made of how participants' will participate in:                                                                   |     |    |
| <i>Photo taking?</i>                                                                                                                             |     |    |
| <i>Photo selection for discussion?</i>                                                                                                           |     |    |
| <i>Data analysis?</i>                                                                                                                            |     |    |
| <i>Photo selection for display in exhibits?</i>                                                                                                  |     |    |
| <i>Photo selection for display in journal publications?</i>                                                                                      |     |    |
| <i>Photo selection for display in other media (websites etc...)?</i>                                                                             |     |    |
| <i>Creation/design of Photo-texts (e.g. single or collage, title and/or caption)?</i>                                                            |     |    |
| <i>Photo exhibiting?</i>                                                                                                                         |     |    |
| <i>Manuscript preparation?</i>                                                                                                                   |     |    |
| <i>Selection and prioritization of photo-texts for display in journal publications?</i>                                                          |     |    |
| <b>During the research project:</b>                                                                                                              |     |    |
| Has the study purpose & level of involvement been explained to study participants?                                                               |     |    |
| Has extra time in the research process been allocated to include participant input?                                                              |     |    |
| Have discussions of authorship (including publication target) been discussed with participants?                                                  |     |    |
